# Supplementary material for: Study on the Potential for Stimulating Mulberry Growth and Drought Tolerance of Plant Growth-Promoting Fungi
Source: MDPI journal article supplement (doi:10.3390/ijms24044090), 2023-02-17
Supplement: s1 [file s1]

## Supporting information

**Table S1** Taxonomic analysis of fungal isolates from mulberry trees.

| Strain ID | Source | Phylum        | Class           | Family               | Genus                  |
|-----------|--------|---------------|-----------------|----------------------|------------------------|
| GS1       | stem   | Ascomycota    | Eurotiomycetes  | Trichocomaceae       | <i>Talaromyces</i>     |
| GS2       | stem   | Ascomycota    | Sordariomycetes | Nectriaceae          | <i>Fusarium</i>        |
| GS3       | stem   | Ascomycota    | Sordariomycetes | Nectriaceae          | <i>Fusarium</i>        |
| GS4       | stem   | Ascomycota    | Sordariomycetes | Nectriaceae          | <i>Fusarium</i>        |
| GS5       | stem   | Ascomycota    | Sordariomycetes | Nectriaceae          | <i>Fusarium</i>        |
| GS6       | stem   | Ascomycota    | Sordariomycetes | Nectriaceae          | <i>Fusarium</i>        |
| GS7       | stem   | Ascomycota    | Dothideomycetes | Massariaceae         | <i>Lentithecium</i>    |
| GS8       | stem   | Ascomycota    | Sordariomycetes | Nectriaceae          | <i>Fusarium</i>        |
| GS9       | stem   | Ascomycota    | Sordariomycetes | Xylariaceae          | <i>Xylaria</i>         |
| GS10      | stem   | Ascomycota    | Sordariomycetes | Nectriaceae          | <i>Fusarium</i>        |
| GS11      | stem   | Ascomycota    | Dothideomycetes | Massariaceae         | <i>Lentithecium</i>    |
| GS13      | stem   | Ascomycota    | Sordariomycetes | Nectriaceae          | <i>Fusarium</i>        |
| GS14      | stem   | Ascomycota    | Dothideomycetes | Didymellaceae        | <i>Phoma</i>           |
| GS15      | stem   | Ascomycota    | Dothideomycetes | Massariaceae         | <i>Aquastroma</i>      |
| GS16      | stem   | Ascomycota    | Dothideomycetes | Massariaceae         | <i>Lentithecium</i>    |
| GS19      | stem   | Ascomycota    | Sordariomycetes | Nectriaceae          | -                      |
| GS20      | stem   | Ascomycota    | Sordariomycetes | Clavicipitaceae      | <i>Aschersonia</i>     |
| GS21      | stem   | Ascomycota    | Sordariomycetes | Nectriaceae          | <i>Fusarium</i>        |
| GS22      | stem   | Ascomycota    | Sordariomycetes | Diaporthaceae        | <i>Diaporthe</i>       |
| GS23      | stem   | Ascomycota    | Sordariomycetes | Nectriaceae          | <i>Fusarium</i>        |
| GS24      | stem   | Basidiomycota | Agaricomycetes  | Polyporaceae         | <i>Trametes</i>        |
| GR1       | root   | Ascomycota    | Sordariomycetes | Nectriaceae          | <i>Fusarium</i>        |
| GR2       | root   | Ascomycota    | Sordariomycetes | Nectriaceae          | <i>Fusarium</i>        |
| GR3       | root   | Ascomycota    | Dothideomycetes | Didymellaceae        | <i>Boeremia</i>        |
| GR4       | root   | Ascomycota    | Eurotiomycetes  | Aspergillaceae       | <i>Aspergillus</i>     |
| GR5       | root   | Ascomycota    | Sordariomycetes | Ophiocordycipitaceae | <i>Purpureocillium</i> |
| GR6       | root   | Ascomycota    | Eurotiomycetes  | Aspergillaceae       | <i>Aspergillus</i>     |
| GR7       | root   | Ascomycota    | Eurotiomycetes  | Aspergillaceae       | <i>Penicillium</i>     |
| GR8       | root   | Ascomycota    | Dothideomycetes | Didymellaceae        | <i>Juxtiphoma</i>      |
| GR9       | root   | Ascomycota    | Sordariomycetes | Nectriaceae          | <i>Fusarium</i>        |
| GR10      | root   | Ascomycota    | Dothideomycetes | Didymellaceae        | <i>Juxtiphoma</i>      |
| GR11      | root   | Ascomycota    | Dothideomycetes | Didymellaceae        | <i>Juxtiphoma</i>      |
| GR12      | root   | Ascomycota    | Sordariomycetes | Nectriaceae          | <i>Fusarium</i>        |
| GR13      | root   | Ascomycota    | Dothideomycetes | Didymellaceae        | <i>Boeremia</i>        |
| GR14      | root   | Ascomycota    | Leotiomyces     | Pseudeurotiaceae     | <i>Pseudeurotium</i>   |
| GR15      | root   | Ascomycota    | Sordariomycetes | Nectriaceae          | <i>Ilyonectria</i>     |
| GR16      | root   | Ascomycota    | Sordariomycetes | Nectriaceae          | <i>Fusarium</i>        |
| GR17      | root   | Ascomycota    | Dothideomycetes | Didymellaceae        | <i>Juxtiphoma</i>      |
| GR18      | root   | Ascomycota    | Dothideomycetes | Didymellaceae        | <i>Juxtiphoma</i>      |
| GR19      | root   | Ascomycota    | Eurotiomycetes  | Aspergillaceae       | <i>Penicillium</i>     |

|       |                  |              |                 |                  |                      |
|-------|------------------|--------------|-----------------|------------------|----------------------|
| GR20  | root             | Ascomycota   | Leotiomycetes   | Pseudeurotiaceae | <i>Pseudeurotium</i> |
| GR21  | root             | Ascomycota   | Sordariomycetes | Hypocreaceae     | <i>Trichoderma</i>   |
| GR22  | root             | Ascomycota   | Eurotiomycetes  | Aspergillaceae   | <i>Aspergillus</i>   |
| GR23  | root             | Ascomycota   | Eurotiomycetes  | Aspergillaceae   | <i>Penicillium</i>   |
| GR24  | root             | Ascomycota   | Dothideomycetes | Cladosporiaceae  | <i>Cladosporium</i>  |
| GR25  | root             | Ascomycota   | Sordariomycetes | Hypocreaceae     | <i>Trichoderma</i>   |
| GR26  | root             | Ascomycota   | Sordariomycetes | Nectriaceae      | -                    |
| GR27  | root             | Ascomycota   | Sordariomycetes | Nectriaceae      | <i>Fusarium</i>      |
| GR29  | root             | Ascomycota   | Dothideomycetes | Cladosporiaceae  | <i>Cladosporium</i>  |
| GR30  | root             | Ascomycota   | Leotiomycetes   | Pseudeurotiaceae | <i>Pseudeurotium</i> |
| GR32  | root             | Ascomycota   | Leotiomycetes   | Pseudeurotiaceae | <i>Pseudeurotium</i> |
| GR33  | root             | Ascomycota   | Sordariomycetes | Nectriaceae      | <i>Fusarium</i>      |
| GR35  | root             | Ascomycota   | Saccharomycetes | Dipodascaceae    | <i>Galactomyces</i>  |
| GRs1  | rhizosphere soil | Ascomycota   | Eurotiomycetes  | Aspergillaceae   | <i>Penicillium</i>   |
| GRs2  | rhizosphere soil | Ascomycota   | Sordariomycetes | Nectriaceae      | <i>Fusarium</i>      |
| GRs3  | rhizosphere soil | Ascomycota   | Dothideomycetes | Didymellaceae    | <i>Juxtiphoma</i>    |
| GRs4  | rhizosphere soil | Mucoromycota | Zygomycetes     | Mortierellaceae  | <i>Mortierella</i>   |
| GRs5  | rhizosphere soil | Ascomycota   | Sordariomycetes | Bionectriaceae   | <i>Clonostachys</i>  |
| GRs7  | rhizosphere soil | Ascomycota   | Dothideomycetes | Morosphaeriaceae | <i>Acrocalymma</i>   |
| GRs8  | rhizosphere soil | Ascomycota   | Sordariomycetes | Nectriaceae      | <i>Fusarium</i>      |
| GRs9  | rhizosphere soil | Ascomycota   | Eurotiomycetes  | Aspergillaceae   | <i>Aspergillus</i>   |
| GRs10 | rhizosphere soil | Mucoromycota | Zygomycetes     | Mortierellaceae  | <i>Mortierella</i>   |
| GRs11 | rhizosphere soil | Mucoromycota | Zygomycetes     | Mortierellaceae  | <i>Mortierella</i>   |
| GRs12 | rhizosphere soil | Ascomycota   | Leotiomycetes   | Pseudeurotiaceae | <i>Pseudeurotium</i> |

Note: “-” represents unclassified fungi at the genus level.

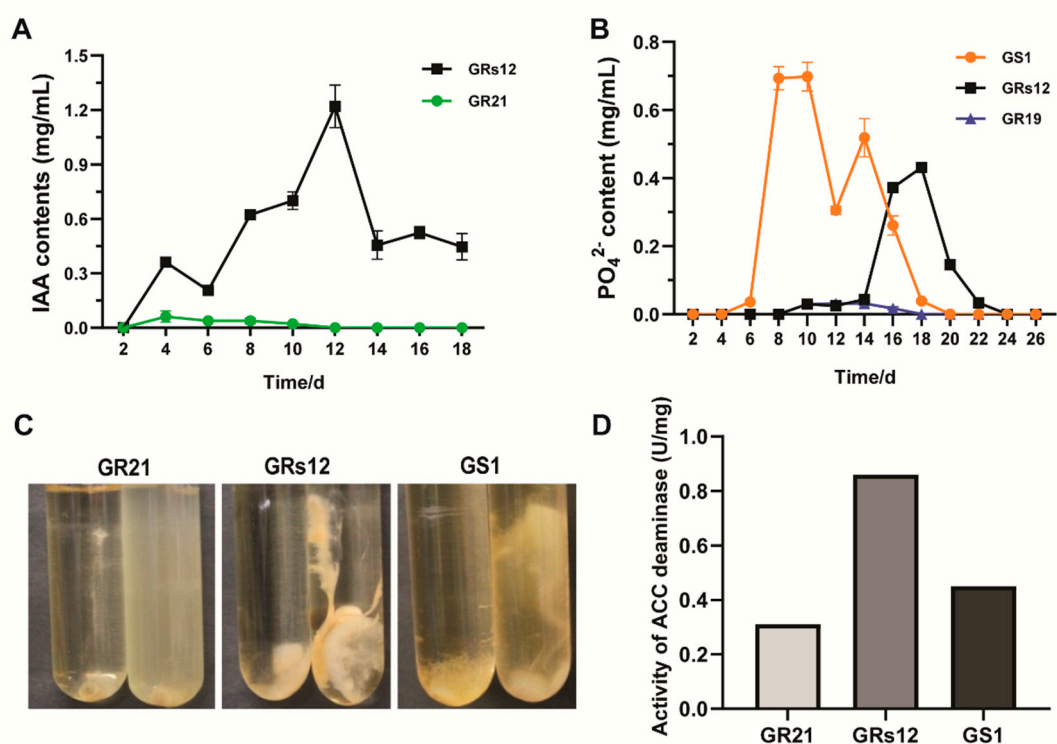

**Figure S1.** The plant growth-promoting traits of potential plant growth-promoting fungi. **(A)** The IAA production by GRs12 and GR21 strains over time. **(B)** Phosphate from  $\text{Ca}_3(\text{PO}_4)_2$  released by GS1, GRs12, and GR19 strains over time. Data represent mean  $\pm$  standard deviation ( $n = 3$ ). **(C)** The ability to utilize ACC of GR21, GRs12, and GS1 strains. Left, the control medium without ACC. Right, ADF medium adding with 3 mM ACC. **(D)** The activity of ACC deaminase of GR21, GRs12, and GS1 strains after 10-day inoculation.

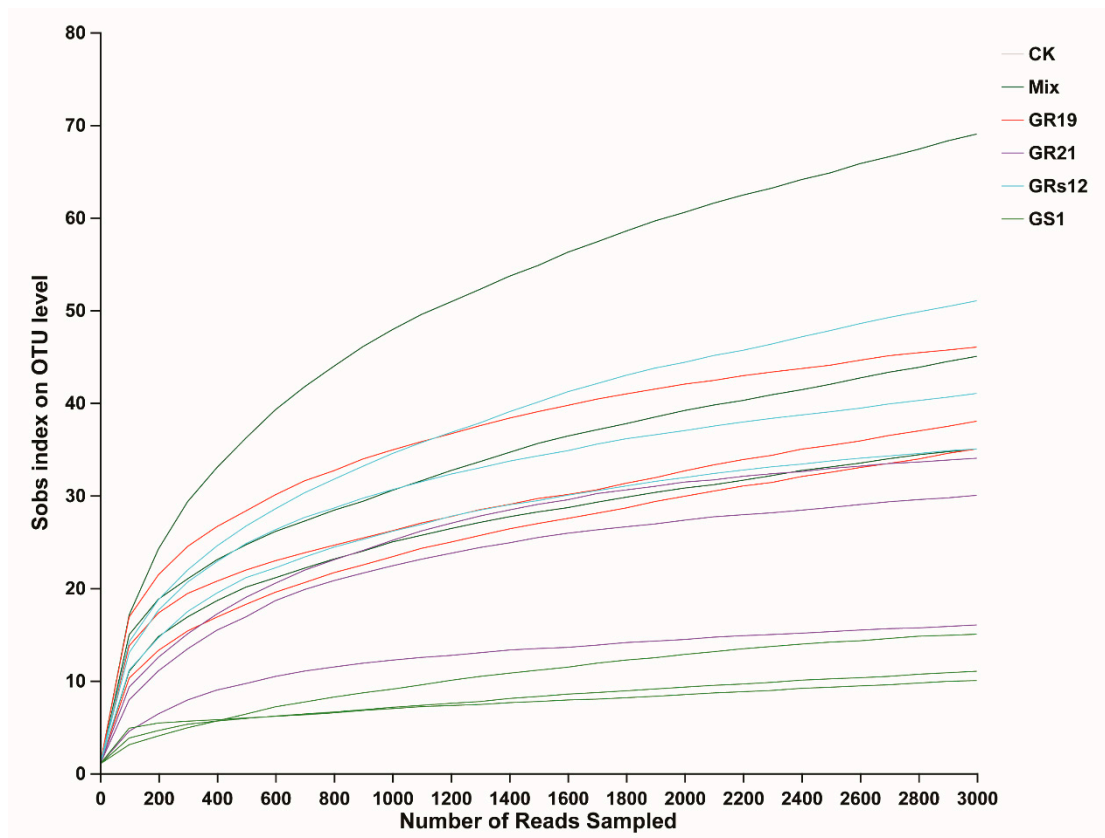

**Figure S2.** Rarefaction curves depicting the number of OTUs with 97% similarity identified from rhizosphere soil of fungi-treated and control groups. GS1, GRs12, GR19, GR21, Mix, and CK represented mulberry seedlings treated with *Talaromyces* sp. GS1 at the initial concentration, *Pseudeurotium* sp. GRs12 at the initial concentration, *Penicillium* sp. GR19 at the 10-fold diluted suspensions, *Trichoderma* sp. GR21 at the 10-fold diluted suspensions, mixed fungi at 100-fold diluted suspensions, and water, respectively.

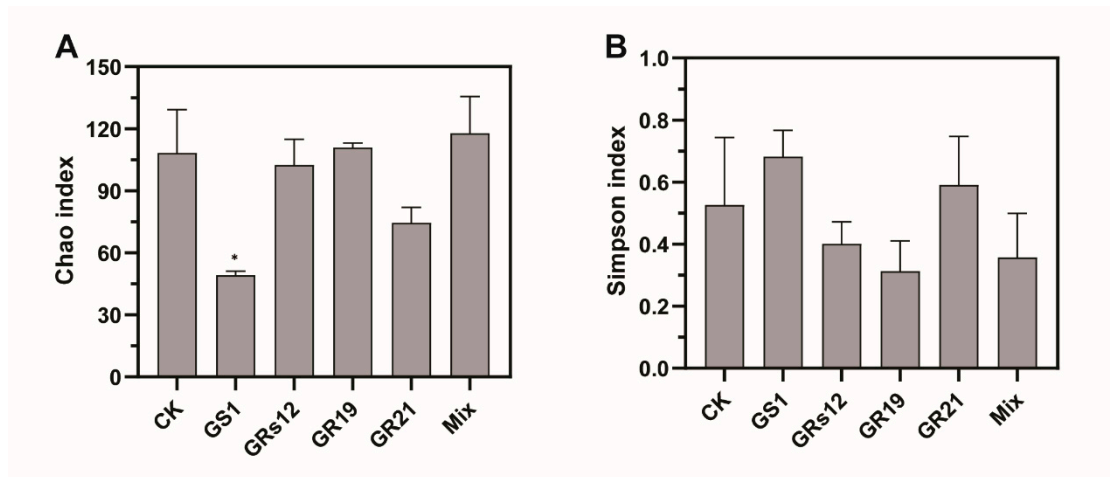

**Figure S3.** The  $\alpha$ -diversity of rhizosphere soil of control and inoculated mulberry. **(A)** The Chao index. **(B)** The Simpson index. Data represented mean  $\pm$  standard deviation ( $n = 3$ ). Statistically significant differences between fungi-treated and control groups were analyzed using Dunnett's one-way analysis of variance. \*  $P < 0.05$ . GS1, GRs12, GR19, GR21, Mix, and CK represented mulberry seedlings treated with *Talaromyces* sp. GS1 at the initial concentration, *Pseudeurotium* sp. GRs12 at the initial concentration, *Penicillium* sp. GR19 at the 10-fold diluted suspensions, *Trichoderma* sp. GR21 at the 10-fold diluted suspensions, mixed fungi at the 100-fold diluted suspensions, and water, respectively.

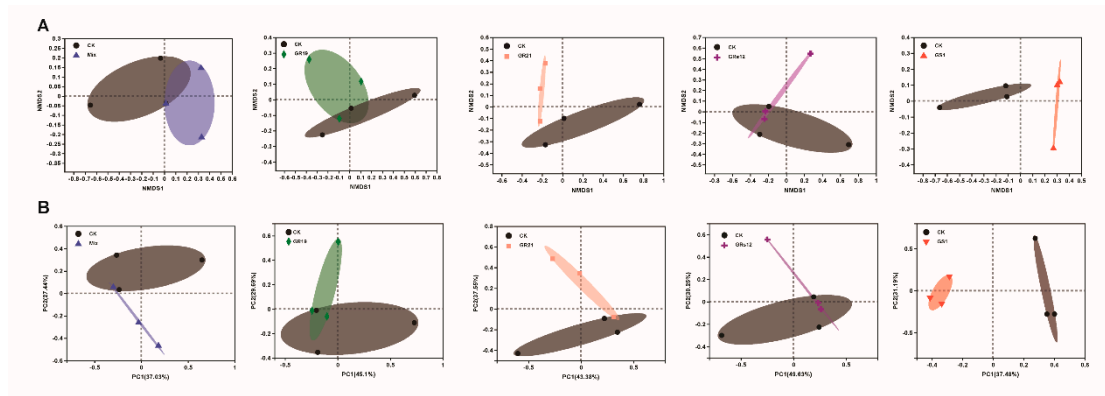

**Figure S4.** The  $\beta$ -analysis of fungal communities of rhizosphere soil based on Bray-Curtis distances. **(A)** NMDS analysis between plant growth-promoting fungi treated group with control group. **(B)** PCoA analysis between plant growth-promoting fungi treated group with control group. GS1, GRs12, GR19, GR21, Mix, and CK represented mulberry seedlings treated with *Talaromyces* sp. GS1 at the initial concentration, *Pseudeurotium* sp. GRs12 at the initial concentration, *Penicillium* sp. GR19 at the 10-fold diluted suspensions, *Trichoderma* sp. GR21 at the 10-fold diluted suspensions, mixed fungi at the 100-fold diluted suspensions, and water, respectively.

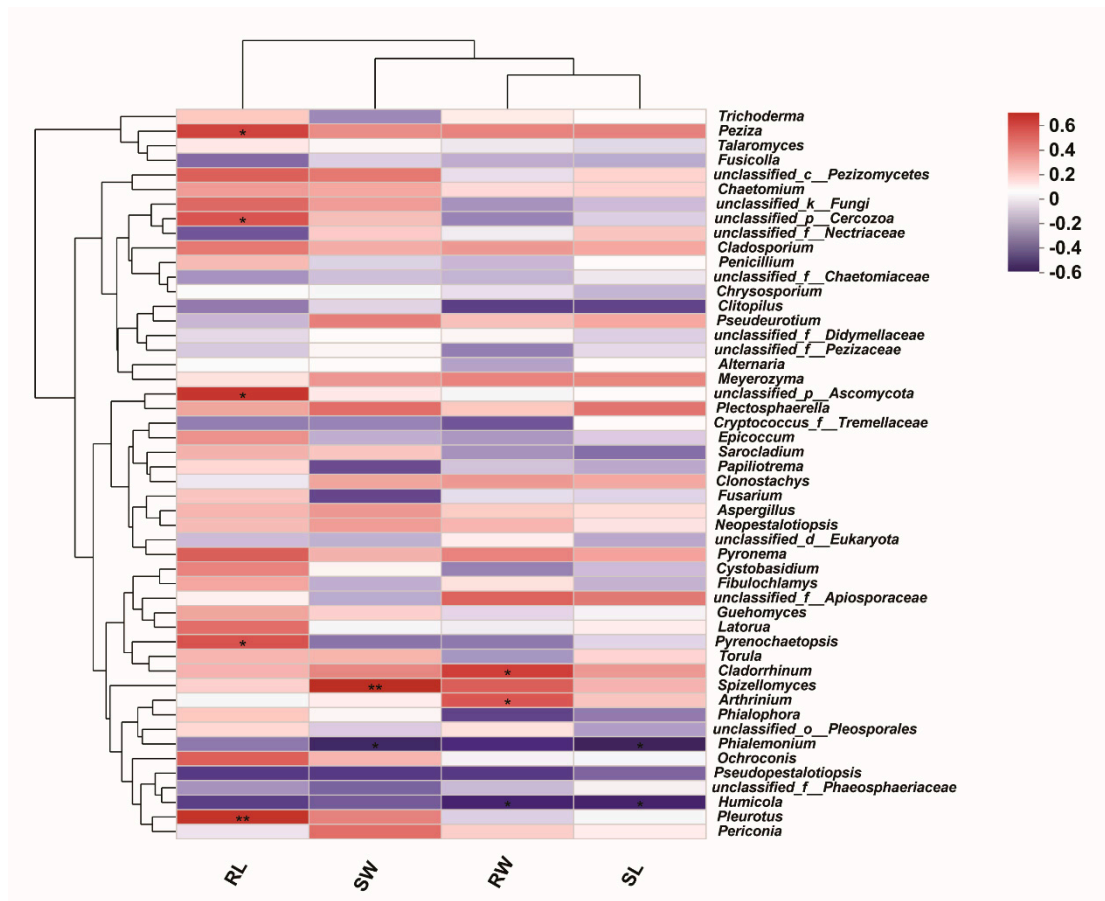

**Figure S5.** Heatmap of correlation between mulberry growth parameters and top 50 fungal genera using the Spearman correlation coefficient. RL and SL represented the length of mulberry root and shoot, respectively. RW and SW represented the fresh weight of mulberry root and shoot, respectively. \*\*  $P < 0.01$ , \*  $P < 0.05$ .

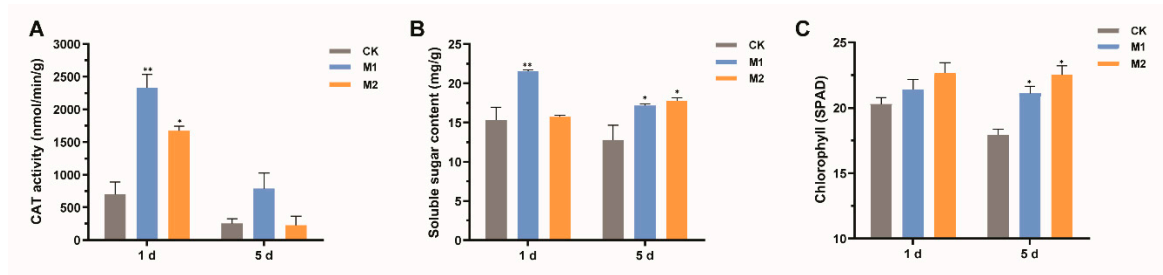

**Figure S6.** Effects of two types of mixed fungal suspensions on anti-stress substrates of mulberry. **(A)** CAT enzyme activity. **(B)** Soluble sugar content. **(C)** Chlorophyll content. M1 represented mulberry seedlings treated with mixed fungi suspensions consisting of *Talaromyces* sp. GS1 and *Pseudeurotium* sp. GRs12 at the initial concentration, and *Penicillium* sp. GR19 and *Trichoderma* sp. GR21 at the 10-fold diluted suspensions. M2 represented mulberry seedlings treated with mixed fungi at 100-fold dilution suspensions. CK represented mulberry seedlings treated with water. Data represent mean  $\pm$  standard deviation ( $n = 3$ ). Statistically significant differences between fungi-treated and control mulberry seedlings suffering 1 day and 5 days of drought stress were respectively analyzed using Dunnett's one-way analysis of variance. \*\*  $P < 0.01$ , \*  $P < 0.05$ .
